# Supplementary material for: Leveraging Northern European population history; novel low frequency variants for polycystic ovary syndrome
Source: bioRxiv or medRxiv preprint supplement (doi:10.1101/2021.05.20.21257510), 2021-05-23
Supplement: Supplementary file [file media-1.pdf]

# Contributors of FinnGen

## Steering Committee

Aarno Palotie     Institute for Molecular Medicine Finland, HiLIFE, University of Helsinki, Finland

Mark Daly        Institute for Molecular Medicine Finland, HiLIFE, University of Helsinki, Finland

## Pharmaceutical companies

Bridget Riley-Gills     Abbvie, Chicago, IL, United States

Howard Jacob         Abbvie, Chicago, IL, United States

Dirk Paul             Astra Zeneca, Cambridge, United Kingdom

Heiko Runz            Biogen, Cambridge, MA, United States

Sally John             Biogen, Cambridge, MA, United States

Robert Plenge         Celgene, Summit, NJ, United States/Bristol Myers Squibb, New York, NY, United States

Mark McCarthy        Genentech, San Francisco, CA, United States

Julie Hunkapiller     Genentech, San Francisco, CA, United States

Meg Ehm              GlaxoSmithKline, Brentford, United Kingdom

Kirsi Auro             GlaxoSmithKline, Brentford, United Kingdom

Caroline Fox         Merck, Kenilworth, NJ, United States

Anders Mälarstig     Pfizer, New York, NY, United States

Katherine Klinger    Sanofi, Paris, France

Deepak Raipal        Sanofi, Paris, France

Tim Behrens          Maze Therapeutics, San Francisco, CA, United States

Robert Yang         Janssen Biotech, Beerse, Belgium

Richard Siegel        Novartis, Basel, Switzerland

## University of Helsinki & Biobanks

Tomi Mäkelä         HiLIFE, University of Helsinki, Finland, Finland

Jaakko Kaprio        Institute for Molecular Medicine Finland, HiLIFE, Helsinki, Finland, Finland

Petri Virolainen     Auria Biobank / University of Turku / Hospital District of Southwest Finland, Turku,  
Finland

Antti Hakanen        Auria Biobank / University of Turku / Hospital District of Southwest Finland, Turku,  
Finland

|                                            |                                                                                                                    |
|--------------------------------------------|--------------------------------------------------------------------------------------------------------------------|
| Terhi Kilpi                                | THL Biobank / The National Institute of Health and Welfare Helsinki, Finland                                       |
| Markus Perola                              | THL Biobank / The National Institute of Health and Welfare Helsinki, Finland                                       |
| Jukka Partanen<br>Helsinki, Finland        | Finnish Red Cross Blood Service / Finnish Hematology Registry and Clinical Biobank,<br>Helsinki, Finland           |
| Anne Pitkäranta<br>Helsinki                | Helsinki Biobank / Helsinki University and Hospital District of Helsinki and Uusimaa,<br>Helsinki                  |
| Juhani Junttila<br>District, Oulu, Finland | Northern Finland Biobank Borealis / University of Oulu / Northern Ostrobothnia Hospital<br>District, Oulu, Finland |
| Raisa Serpi<br>District, Oulu, Finland     | Northern Finland Biobank Borealis / University of Oulu / Northern Ostrobothnia Hospital<br>District, Oulu, Finland |
| Tarja Laitinen<br>Tampere, Finland         | Finnish Clinical Biobank Tampere / University of Tampere / Pirkanmaa Hospital District,<br>Tampere, Finland        |
| Johanna Mäkelä<br>Tampere, Finland         | Finnish Clinical Biobank Tampere / University of Tampere / Pirkanmaa Hospital District,<br>Tampere, Finland        |
| Veli-Matti Kosma<br>Kuopio, Finland        | Biobank of Eastern Finland / University of Eastern Finland / Northern Savo Hospital District,<br>Kuopio, Finland   |
| Urho Kujala<br>Jyväskylä, Finland          | Central Finland Biobank / University of Jyväskylä / Central Finland Health Care District,<br>Jyväskylä, Finland    |

#### **Other Experts/ Non-Voting Members**

|                |                                     |
|----------------|-------------------------------------|
| Outi Tuovila   | Business Finland, Helsinki, Finland |
| Raimo Pakkanen | Business Finland, Helsinki, Finland |

#### **Scientific Committee**

##### **Pharmaceutical companies**

|                    |                                         |
|--------------------|-----------------------------------------|
| Jeffrey Waring     | Abbvie, Chicago, IL, United States      |
| Ali Abbasi         | Abbvie, Chicago, IL, United States      |
| Mengzhen Liu       | Abbvie, Chicago, IL, United States      |
| Ioanna Tachmazidou | Astra Zeneca, Cambridge, United Kingdom |
| Chia-Yen Chen      | Biogen, Cambridge, MA, United States    |

|                         |                                                                                      |
|-------------------------|--------------------------------------------------------------------------------------|
| Heiko Runz              | Biogen, Cambridge, MA, United States                                                 |
| Shameek Biswas          | Celgene, Summit, NJ, United States/Bristol Myers Squibb, New York, NY, United States |
| Julie Hunkapiller       | Genentech, San Francisco, CA, United States                                          |
| Meg Ehm                 | GlaxoSmithKline, Brentford, United Kingdom                                           |
| Neha Raghavan           | Merck, Kenilworth, NJ, United States                                                 |
| Adriana Huertas-Vazquez | Merck, Kenilworth, NJ, United States                                                 |
| Anders Målarstig        | Pfizer, New York, NY, United States                                                  |
| Xinli Hu                | Pfizer, New York, NY, United States                                                  |
| Katherine Klinger       | Sanofi, Paris, France                                                                |
| Matthias Gossel         | Sanofi, Paris, France                                                                |
| Robert Graham           | Maze Therapeutics, San Francisco, CA, United States                                  |
| Tim Behrens             | Maze Therapeutics, San Francisco, CA, United States                                  |
| Beryl Cummings          | Maze Therapeutics, San Francisco, CA, United States                                  |
| Wilco Fleuren           | Janssen Biotech, Beerse, Belgium                                                     |
| Dawn Waterworth         | Janssen Biotech, Beerse, Belgium                                                     |
| Nicole Renaud           | Novartis, Basel, Switzerland                                                         |
| Aviv Madar              | Novartis, Basel, Switzerland                                                         |
| Maen Obeidat            | Novartis, Basel, Switzerland                                                         |

### **University of Helsinki & Biobanks**

|                    |                                                                                                                    |
|--------------------|--------------------------------------------------------------------------------------------------------------------|
| Samuli Ripatti     | Institute for Molecular Medicine Finland, HiLIFE, Helsinki, Finland                                                |
| Johanna Schleutker | Auria Biobank / Univ. of Turku / Hospital District of Southwest Finland, Turku, Finland                            |
| Markus Perola      | THL Biobank / The National Institute of Health and Welfare Helsinki, Finland                                       |
| Mikko Arvas        | Finnish Red Cross Blood Service / Finnish Hematology Registry and Clinical Biobank,<br>Helsinki, Finland           |
| Olli Carpén        | Helsinki Biobank / Helsinki University and Hospital District of Helsinki and Uusimaa,<br>Helsinki                  |
| Reetta Hinttala    | Northern Finland Biobank Borealis / University of Oulu / Northern Ostrobothnia Hospital<br>District, Oulu, Finland |

Johannes Kettunen Northern Finland Biobank Borealis / University of Oulu / Northern Ostrobothnia Hospital District, Oulu, Finland

Johanna Mäkelä Finnish Clinical Biobank Tampere / University of Tampere / Pirkanmaa Hospital District, Tampere, Finland

Arto Mannermaa Biobank of Eastern Finland / University of Eastern Finland / Northern Savo Hospital District, Kuopio, Finland

Jari Laukkanen Central Finland Biobank / University of Jyväskylä / Central Finland Health Care District, Jyväskylä, Finland

Urho Kujala Central Finland Biobank / University of Jyväskylä / Central Finland Health Care District, Jyväskylä, Finland

## Clinical Groups

### Neurology Group

Reetta Kälviäinen Northern Savo Hospital District, Kuopio, Finland

Valtteri Julkunen Northern Savo Hospital District, Kuopio, Finland

Hilkka Soinen Northern Savo Hospital District, Kuopio, Finland

Anne Remes Northern Ostrobothnia Hospital District, Oulu, Finland

Mikko Hiltunen Northern Savo Hospital District, Kuopio, Finland

Jukka Peltola Pirkanmaa Hospital District, Tampere, Finland

Pentti Tienari Hospital District of Helsinki and Uusimaa, Helsinki, Finland

Juha Rinne Hospital District of Southwest Finland, Turku, Finland

Roosa Kallionpää Hospital District of Southwest Finland, Turku, Finland

Ali Abbasi Abbvie, Chicago, IL, United States

Adam Ziemann Abbvie, Chicago, IL, United States

Jeffrey Waring Abbvie, Chicago, IL, United States

Sahar Esmaeeli Abbvie, Chicago, IL, United States

Nizar Smaoui Abbvie, Chicago, IL, United States

Anne Lehtonen Abbvie, Chicago, IL, United States

Susan Eaton Biogen, Cambridge, MA, United States

Heiko Runz Biogen, Cambridge, MA, United States

|                     |                                                                                       |
|---------------------|---------------------------------------------------------------------------------------|
| Sanni Lahdenperä    | Biogen, Cambridge, MA, United States                                                  |
| Janet van Adelsberg | Celgene, Summit, NJ, United States/ Bristol Myers Squibb, New York, NY, United States |
| Shameek Biswas      | Celgene, Summit, NJ, United States/ Bristol Myers Squibb, New York, NY, United States |
| Julie Hunkapiller   | Genentech, San Francisco, CA, United States                                           |
| Natalie Bowers      | Genentech, San Francisco, CA, United States                                           |
| Edmond Teng         | Genentech, San Francisco, CA, United States                                           |
| Sarah Pendergrass   | Genentech, San Francisco, CA, United States                                           |
| Onuralp Soylemez    | Merck, Kenilworth, NJ, United States                                                  |
| Kari Linden         | Pfizer, New York, NY, United States                                                   |
| Fanli Xu            | GlaxoSmithKline, Brentford, United Kingdom                                            |
| David Pulford       | GlaxoSmithKline, Brentford, United Kingdom                                            |
| Kirsi Auro          | GlaxoSmithKline, Brentford, United Kingdom                                            |
| Laura Addis         | GlaxoSmithKline, Brentford, United Kingdom                                            |
| John Eicher         | GlaxoSmithKline, Brentford, United Kingdom                                            |
| Minna Raivio        | Hospital District of Helsinki and Uusimaa, Helsinki, Finland                          |
| Sarah Pendergrass   | Genentech, San Francisco, CA, United States                                           |
| Beryl Cummings      | Maze Therapeutics, San Francisco, CA, United States                                   |
| Juulia Partanen     | Institute for Molecular Medicine Finland, HiLIFE, University of Helsinki, Finland     |

### **Gastroenterology Group**

|                    |                                                              |
|--------------------|--------------------------------------------------------------|
| Martti Färkkilä    | Hospital District of Helsinki and Uusimaa, Helsinki, Finland |
| Jukka Koskela      | Hospital District of Helsinki and Uusimaa, Helsinki, Finland |
| Sampsa Pikkarainen | Hospital District of Helsinki and Uusimaa, Helsinki, Finland |
| Airi Jussila       | Pirkanmaa Hospital District, Tampere, Finland                |
| Katri Kaukinen     | Pirkanmaa Hospital District, Tampere, Finland                |
| Timo Blomster      | Northern Ostrobothnia Hospital District, Oulu, Finland       |
| Mikko Kiviniemi    | Northern Savo Hospital District, Kuopio, Finland             |
| Markku Voutilainen | Hospital District of Southwest Finland, Turku, Finland       |
| Ali Abbasi         | Abbvie, Chicago, IL, United States                           |
| Graham Heap        | Abbvie, Chicago, IL, United States                           |

|                   |                                                                                       |
|-------------------|---------------------------------------------------------------------------------------|
| Jeffrey Waring    | Abbvie, Chicago, IL, United States                                                    |
| Nizar Smaoui      | Abbvie, Chicago, IL, United States                                                    |
| Fedik Rahimov     | Abbvie, Chicago, IL, United States                                                    |
| Anne Lehtonen     | Abbvie, Chicago, IL, United States                                                    |
| Keith Usiskin     | Celgene, Summit, NJ, United States/ Bristol Myers Squibb, New York, NY, United States |
| Tim Lu            | Genentech, San Francisco, CA, United States                                           |
| Natalie Bowers    | Genentech, San Francisco, CA, United States                                           |
| Danny Oh          | Genentech, San Francisco, CA, United States                                           |
| Sarah Pendergrass | Genentech, San Francisco, CA, United States                                           |
| Kirsi Kalpala     | Pfizer, New York, NY, United States                                                   |
| Melissa Miller    | Pfizer, New York, NY, United States                                                   |
| Xinli Hu          | Pfizer, New York, NY, United States                                                   |
| Linda McCarthy    | GlaxoSmithKline, Brentford, United Kingdom                                            |
| Onuralp Soylemez  | Merck, Kenilworth, NJ, United States                                                  |
| Mark Daly         | Institute for Molecular Medicine Finland, HiLIFE, University of Helsinki, Finland     |

### **Rheumatology Group**

|                          |                                                              |
|--------------------------|--------------------------------------------------------------|
| Kari Eklund              | Hospital District of Helsinki and Uusimaa, Helsinki, Finland |
| Antti Palomäki           | Hospital District of Southwest Finland, Turku, Finland       |
| Pia Isomäki              | Pirkanmaa Hospital District, Tampere, Finland                |
| Laura Pirilä             | Hospital District of Southwest Finland, Turku, Finland       |
| Oili Kaipiainen-Seppänen | Northern Savo Hospital District, Kuopio, Finland             |
| Johanna Huhtakangas      | Northern Ostrobothnia Hospital District, Oulu, Finland       |
| Ali Abbasi               | Abbvie, Chicago, IL, United States                           |
| Jeffrey Waring           | Abbvie, Chicago, IL, United States                           |
| Fedik Rahimov            | Abbvie, Chicago, IL, United States                           |
| Apinya Lertratanakul     | Abbvie, Chicago, IL, United States                           |
| Nizar Smaoui             | Abbvie, Chicago, IL, United States                           |
| Anne Lehtonen            | Abbvie, Chicago, IL, United States                           |
| David Close              | Astra Zeneca, Cambridge, United Kingdom                      |

|                        |                                                                                       |
|------------------------|---------------------------------------------------------------------------------------|
| Marla Hochfeld         | Celgene, Summit, NJ, United States/ Bristol Myers Squibb, New York, NY, United States |
| Natalie Bowers         | Genentech, San Francisco, CA, United States                                           |
| Sarah Pendergrass      | Genentech, San Francisco, CA, United States                                           |
| Onuralp Soylemez       | Merck, Kenilworth, NJ, United States                                                  |
| Kirsi Kalpala          | Pfizer, New York, NY, United States                                                   |
| Nan Bing               | Pfizer, New York, NY, United States                                                   |
| Xinli Hu               | Pfizer, New York, NY, United States                                                   |
| Jorge Esparza Gordillo | GlaxoSmithKline, Brentford, United Kingdom                                            |
| Kirsi Auro             | GlaxoSmithKline, Brentford, United Kingdom                                            |
| Dawn Waterworth        | Janssen Biotech, Beerse, Belgium                                                      |
| Nina Mars              | Institute for Molecular Medicine Finland, HiLIFE, Helsinki, Finland                   |

### **Pulmonology Group**

|                    |                                                                                       |
|--------------------|---------------------------------------------------------------------------------------|
| Tarja Laitinen     | Pirkanmaa Hospital District, Tampere, Finland                                         |
| Margit Pelkonen    | Northern Savo Hospital District, Kuopio, Finland                                      |
| Paula Kauppi       | Hospital District of Helsinki and Uusimaa, Helsinki, Finland                          |
| Hannu Kankaanranta | Pirkanmaa Hospital District, Tampere, Finland                                         |
| Terttu Harju       | Northern Ostrobothnia Hospital District, Oulu, Finland                                |
| Riitta Lahesmaa    | Hospital District of Southwest Finland, Turku, Finland                                |
| Nizar Smaoui       | Abbvie, Chicago, IL, United States                                                    |
| Alex Mackay        | Astra Zeneca, Cambridge, United Kingdom                                               |
| Glenda Lassi       | Astra Zeneca, Cambridge, United Kingdom                                               |
| Susan Eaton        | Biogen, Cambridge, MA, United States                                                  |
| Steven Greenberg   | Celgene, Summit, NJ, United States/ Bristol Myers Squibb, New York, NY, United States |
| Hubert Chen        | Genentech, San Francisco, CA, United States                                           |
| Sarah Pendergrass  | Genentech, San Francisco, CA, United States                                           |
| Natalie Bowers     | Genentech, San Francisco, CA, United States                                           |
| Joanna Betts       | GlaxoSmithKline, Brentford, United Kingdom                                            |
| Soumitra Ghosh     | GlaxoSmithKline, Brentford, United Kingdom                                            |
| Kirsi Auro         | GlaxoSmithKline, Brentford, United Kingdom                                            |

Rajashree Mishra            GlaxoSmithKline, Brentford, United Kingdom  
Sina Rüeger                 Institute for Molecular Medicine Finland, HiLIFE, University of Helsinki, Finland

**Cardiometabolic Diseases Group**

Teemu Niiranen            The National Institute of Health and Welfare Helsinki, Finland  
Felix Vaura                 The National Institute of Health and Welfare Helsinki, Finland  
Veikko Salomaa            The National Institute of Health and Welfare Helsinki, Finland  
Markus Juonala            Hospital District of Southwest Finland, Turku, Finland  
Kaj Metsärinne            Hospital District of Southwest Finland, Turku, Finland  
Mika Kähönen             Pirkanmaa Hospital District, Tampere, Finland  
Juhani Juntila             Northern Ostrobothnia Hospital District, Oulu, Finland  
Markku Laakso            Northern Savo Hospital District, Kuopio, Finland  
Jussi Pihlajamäki         Northern Savo Hospital District, Kuopio, Finland  
Daniel Gordin             Hospital District of Helsinki and Uusimaa, Helsinki, Finland  
Juha Sinisalo              Hospital District of Helsinki and Uusimaa, Helsinki, Finland  
Marja-Riitta Taskinen    Hospital District of Helsinki and Uusimaa, Helsinki, Finland  
Tiinamajja Tuomi         Hospital District of Helsinki and Uusimaa, Helsinki, Finland  
Jari Laukkanen            Central Finland Health Care District, Jyväskylä, Finland  
Benjamin Challis         Astra Zeneca, Cambridge, United Kingdom  
Dirk Paul                  Astra Zeneca, Cambridge, United Kingdom  
Julie Hunkapiller         Genentech, San Francisco, CA, United States  
Natalie Bowers            Genentech, San Francisco, CA, United States  
Sarah Pendergrass        Genentech, San Francisco, CA, United States  
Onuralp Soylemez         Merck, Kenilworth, NJ, United States  
Jaakko Parkkinen         Pfizer, New York, NY, United States  
Melissa Miller             Pfizer, New York, NY, United States  
Russell Miller             Pfizer, New York, NY, United States  
Audrey Chu                GlaxoSmithKline, Brentford, United Kingdom  
Kirsi Auro                 GlaxoSmithKline, Brentford, United Kingdom  
Keith Usiskin              Celgene, Summit, NJ, United States/ Bristol Myers Squibb, New York, NY, United States



Amanda Elliott Institute for Molecular Medicine Finland, HiLIFE, University of Helsinki, Finland / Broad  
Institute, Cambridge, MA, United States

Joel Rämö Institute for Molecular Medicine Finland, HiLIFE, University of Helsinki, Finland

Samuli Ripatti Institute for Molecular Medicine Finland, HiLIFE, University of Helsinki, Finland

Mary Pat Reeve Institute for Molecular Medicine Finland, HiLIFE, University of Helsinki, Finland

Sanni Ruotsalainen Institute for Molecular Medicine Finland, HiLIFE, University of Helsinki, Finland

### **Oncology Group**

Tuomo Meretoja Hospital District of Helsinki and Uusimaa, Helsinki, Finland

Heikki Joensuu Hospital District of Helsinki and Uusimaa, Helsinki, Finland

Olli Carpén Hospital District of Helsinki and Uusimaa, Helsinki, Finland

Lauri Aaltonen Hospital District of Helsinki and Uusimaa, Helsinki, Finland

Johanna Mattson Hospital District of Helsinki and Uusimaa, Helsinki, Finland

Annika Auranen Pirkanmaa Hospital District , Tampere, Finland

Peeter Karihtala Northern Ostrobothnia Hospital District, Oulu, Finland

Saila Kauppila Northern Ostrobothnia Hospital District, Oulu, Finland

Päivi Auvinen Northern Savo Hospital District, Kuopio, Finland

Klaus Elenius Hospital District of Southwest Finland, Turku, Finland

Johanna Schleutker Hospital District of Southwest Finland, Turku, Finland

Relja Popovic Abbvie, Chicago, IL, United States

Jeffrey Waring Abbvie, Chicago, IL, United States

Bridget Riley-Gillis Abbvie, Chicago, IL, United States

Anne Lehtonen Abbvie, Chicago, IL, United States

Jennifer Schutzman Genentech, San Francisco, CA, United States

Julie Hunkapiller Genentech, San Francisco, CA, United States

Natalie Bowers Genentech, San Francisco, CA, United States

Sarah Pendergrass Genentech, San Francisco, CA, United States

Andrey Loboda Merck, Kenilworth, NJ, United States

Aparna Chhibber Merck, Kenilworth, NJ, United States

Heli Lehtonen Pfizer, New York, NY, United States

|                  |                                                                                   |
|------------------|-----------------------------------------------------------------------------------|
| Stefan McDonough | Pfizer, New York, NY, United States                                               |
| Marika Crohns    | Sanofi, Paris, France                                                             |
| Sauli Vuoti      | Sanofi, Paris, France                                                             |
| Diptee Kulkarni  | GlaxoSmithKline, Brentford, United Kingdom                                        |
| Kirsi Auro       | GlaxoSmithKline, Brentford, United Kingdom                                        |
| Esa Pitkänen     | Institute for Molecular Medicine Finland, HiLIFE, University of Helsinki, Finland |
| Nina Mars        | Institute for Molecular Medicine Finland, HiLIFE, University of Helsinki, Finland |
| Mark Daly        | Institute for Molecular Medicine Finland, HiLIFE, University of Helsinki, Finland |

### **Ophthalmology Group**

|                           |                                                                                                                                      |
|---------------------------|--------------------------------------------------------------------------------------------------------------------------------------|
| Kai Kaarniranta           | Northern Savo Hospital District, Kuopio, Finland                                                                                     |
| Joni A Turunen            | Hospital District of Helsinki and Uusimaa, Helsinki, Finland                                                                         |
| Terhi Ollila              | Hospital District of Helsinki and Uusimaa, Helsinki, Finland                                                                         |
| Sanna Seitsonen           | Hospital District of Helsinki and Uusimaa, Helsinki, Finland                                                                         |
| Hannu Uusitalo            | Pirkanmaa Hospital District, Tampere, Finland                                                                                        |
| Vesa Aaltonen             | Hospital District of Southwest Finland, Turku, Finland                                                                               |
| Hannele Uusitalo-Järvinen | Pirkanmaa Hospital District, Tampere, Finland                                                                                        |
| Marja Luodonpää           | Northern Ostrobothnia Hospital District, Oulu, Finland                                                                               |
| Nina Hautala              | Northern Ostrobothnia Hospital District, Oulu, Finland                                                                               |
| Mengzhen Liu              | Abbvie, Chicago, IL, United States                                                                                                   |
| Heiko Runz                | Biogen, Cambridge, MA, United States                                                                                                 |
| Stephanie Loomis          | Biogen, Cambridge, MA, United States                                                                                                 |
| Erich Strauss             | Genentech, San Francisco, CA, United States                                                                                          |
| Natalie Bowers            | Genentech, San Francisco, CA, United States                                                                                          |
| Hao Chen                  | Genentech, San Francisco, CA, United States                                                                                          |
| Sarah Pendergrass         | Genentech, San Francisco, CA, United States                                                                                          |
| Anna Podgornaia           | Merck, Kenilworth, NJ, United States                                                                                                 |
| Juha Karjalainen          | Institute for Molecular Medicine Finland, HiLIFE, University of Helsinki, Finland / Broad<br>Institute, Cambridge, MA, United States |
| Esa Pitkänen              | Institute for Molecular Medicine Finland, HiLIFE, University of Helsinki, Finland                                                    |

### **Dermatology Group**

|                          |                                                              |
|--------------------------|--------------------------------------------------------------|
| Kaisa Tasanen            | Northern Ostrobothnia Hospital District, Oulu, Finland       |
| Laura Huilaja            | Northern Ostrobothnia Hospital District, Oulu, Finland       |
| Katariina Hannula-Jouppi | Hospital District of Helsinki and Uusimaa, Helsinki, Finland |
| Teea Salmi               | Pirkanmaa Hospital District, Tampere, Finland                |
| Sirkku Peltonen          | Hospital District of Southwest Finland, Turku, Finland       |
| Leena Koulu              | Hospital District of Southwest Finland, Turku, Finland       |
| Kirsi Kalpala            | Pfizer, New York, NY, United States                          |
| Ying Wu                  | Pfizer, New York, NY, United States                          |
| David Choy               | Genentech, San Francisco, CA, United States                  |
| Sarah Pendergrass        | Genentech, San Francisco, CA, United States                  |
| Nizar Smaoui             | Abbvie, Chicago, IL, United States                           |
| Fedik Rahimov            | Abbvie, Chicago, IL, United States                           |
| Anne Lehtonen            | Abbvie, Chicago, IL, United States                           |
| Dawn Waterworth          | Janssen Biotech, Beerse, Belgium                             |

### **Odontology Group**

|                 |                                                              |
|-----------------|--------------------------------------------------------------|
| Pirkko Pussinen | Hospital District of Helsinki and Uusimaa, Helsinki, Finland |
| Aino Salminen   | Hospital District of Helsinki and Uusimaa, Helsinki, Finland |
| Tuula Salo      | Hospital District of Helsinki and Uusimaa, Helsinki, Finland |
| David Rice      | Hospital District of Helsinki and Uusimaa, Helsinki, Finland |
| Pekka Nieminen  | Hospital District of Helsinki and Uusimaa, Helsinki, Finland |
| Ulla Palotie    | Hospital District of Helsinki and Uusimaa, Helsinki, Finland |
| Juha Sinisalo   | Hospital District of Helsinki and Uusimaa, Helsinki, Finland |
| Maria Siponen   | Northern Savo Hospital District, Kuopio, Finland             |
| Liisa Suominen  | Northern Savo Hospital District, Kuopio, Finland             |
| Päivi Mäntylä   | Northern Savo Hospital District, Kuopio, Finland             |
| Ulvi Gursoy     | Hospital District of Southwest Finland, Turku, Finland       |
| Vuokko Anttonen | Northern Ostrobothnia Hospital District, Oulu, Finland       |

Kirsi Sipilä Northern Ostrobothnia Hospital District, Oulu, Finland  
Sarah Pendergrass Genentech, San Francisco, CA, United States

### **Women's Health and Reproduction Group**

Hannele Laivuori Institute for Molecular Medicine Finland, HiLIFE, University of Helsinki, Finland  
Venla Kurra Pirkanmaa Hospital District, Tampere, Finland  
Oskari Heikinheimo Hospital District of Helsinki and Uusimaa, Helsinki, Finland  
Ilkka Kalliala Hospital District of Helsinki and Uusimaa, Helsinki, Finland  
Laura Kotaniemi-Talonen Pirkanmaa Hospital District, Tampere, Finland  
Kari Nieminen Pirkanmaa Hospital District, Tampere, Finland  
Päivi Polo Hospital District of Southwest Finland, Turku, Finland  
Kaarin Mäkikallio Hospital District of Southwest Finland, Turku, Finland  
Eeva Ekholm Hospital District of Southwest Finland, Turku, Finland  
Marja Vääräsmäki Northern Ostrobothnia Hospital District, Oulu, Finland  
Outi Uimari Northern Ostrobothnia Hospital District, Oulu, Finland  
Laure Morin-Papunen Northern Ostrobothnia Hospital District, Oulu, Finland  
Marjo Tuppurainen Northern Savo Hospital District, Kuopio, Finland  
Katja Kivinen Institute for Molecular Medicine Finland, HiLIFE, University of Helsinki, Finland  
Elisabeth Widen Institute for Molecular Medicine Finland, HiLIFE, University of Helsinki, Finland  
Taru Tukiainen Institute for Molecular Medicine Finland, HiLIFE, University of Helsinki, Finland  
Mary Pat Reeve Institute for Molecular Medicine Finland, HiLIFE, University of Helsinki, Finland  
Mark Daly Institute for Molecular Medicine Finland, HiLIFE, University of Helsinki, Finland  
Liu Aoxing Institute for Molecular Medicine Finland, HiLIFE, University of Helsinki, Finland  
Eija Laakkonen University of Jyväskylä, Jyväskylä, Finland  
Niko Välimäki University of Helsinki, Helsinki, Finland  
Lauri Aaltonen Hospital District of Helsinki and Uusimaa, Helsinki, Finland  
Johannes Kettunen Northern Ostrobothnia Hospital District, Oulu, Finland  
Mikko Arvas Finnish Red Cross Blood Service, Helsinki, Finland  
Jeffrey Waring Abbvie, Chicago, IL, United States  
Bridget Riley-Gillis Abbvie, Chicago, IL, United States

|                   |                                                                                   |
|-------------------|-----------------------------------------------------------------------------------|
| Mengzhen Liu      | Abbvie, Chicago, IL, United States                                                |
| Janet Kumar       | GlaxoSmithKline, Brentford, United Kingdom                                        |
| Kirsi Auro        | GlaxoSmithKline, Brentford, United Kingdom                                        |
| Andrea Ganna      | Institute for Molecular Medicine Finland, HiLIFE, University of Helsinki, Finland |
| Sarah Pendergrass | Genentech, San Francisco, CA, United States                                       |

#### **FinnGen Analysis working group**

|                      |                                                                                       |
|----------------------|---------------------------------------------------------------------------------------|
| Justin Wade Davis    | Abbvie, Chicago, IL, United States                                                    |
| Bridget Riley-Gillis | Abbvie, Chicago, IL, United States                                                    |
| Danjuma Quarless     | Abbvie, Chicago, IL, United States                                                    |
| Fedik Rahimov        | Abbvie, Chicago, IL, United States                                                    |
| Sahar Esmaceli       | Abbvie, Chicago, IL, United States                                                    |
| Slavé Petrovski      | Astra Zeneca, Cambridge, United Kingdom                                               |
| Eleonor Wigmore      | Astra Zeneca, Cambridge, United Kingdom                                               |
| Adele Mitchell       | Biogen, Cambridge, MA, United States                                                  |
| Benjamin Sun         | Biogen, Cambridge, MA, United States                                                  |
| Ellen Tsai           | Biogen, Cambridge, MA, United States                                                  |
| Denis Baird          | Biogen, Cambridge, MA, United States                                                  |
| Paola Bronson        | Biogen, Cambridge, MA, United States                                                  |
| Ruoyu Tian           | Biogen, Cambridge, MA, United States                                                  |
| Stephanie Loomis     | Biogen, Cambridge, MA, United States                                                  |
| Yunfeng Huang        | Biogen, Cambridge, MA, United States                                                  |
| Joseph Maranville    | Celgene, Summit, NJ, United States/ Bristol Myers Squibb, New York, NY, United States |
| Shameek Biswas       | Celgene, Summit, NJ, United States/ Bristol Myers Squibb, New York, NY, United States |
| Elmutaz Mohammed     | Celgene, Summit, NJ, United States/ Bristol Myers Squibb, New York, NY, United States |
| Samir Wadhawan       | Celgene, Summit, NJ, United States/ Bristol Myers Squibb, New York, NY, United States |
| Erika Kvikstad       | Celgene, Summit, NJ, United States/ Bristol Myers Squibb, New York, NY, United States |
| Minal Caliskan       | Celgene, Summit, NJ, United States/ Bristol Myers Squibb, New York, NY, United States |
| Diana Chang          | Genentech, San Francisco, CA, United States                                           |
| Julie Hunkapiller    | Genentech, San Francisco, CA, United States                                           |
| Tushar Bhangale      | Genentech, San Francisco, CA, United States                                           |

|                   |                                                                                                                                      |
|-------------------|--------------------------------------------------------------------------------------------------------------------------------------|
| Natalie Bowers    | Genentech, San Francisco, CA, United States                                                                                          |
| Sarah Pendergrass | Genentech, San Francisco, CA, United States                                                                                          |
| Kirill Shkura     | Merck, Kenilworth, NJ, United States                                                                                                 |
| Victor Neduva     | Merck, Kenilworth, NJ, United States                                                                                                 |
| Xing Chen         | Pfizer, New York, NY, United States                                                                                                  |
| Åsa Hedman        | Pfizer, New York, NY, United States                                                                                                  |
| Karen S King      | GlaxoSmithKline, Brentford, United Kingdom                                                                                           |
| Padhraig Gormley  | GlaxoSmithKline, Brentford, United Kingdom                                                                                           |
| Jimmy Liu         | GlaxoSmithKline, Brentford, United Kingdom                                                                                           |
| Clarence Wang     | Sanofi, Paris, France                                                                                                                |
| Ethan Xu          | Sanofi, Paris, France                                                                                                                |
| Franck Auge       | Sanofi, Paris, France                                                                                                                |
| Clement Chatelain | Sanofi, Paris, France                                                                                                                |
| Deepak Rajpal     | Sanofi, Paris, France                                                                                                                |
| Dongyu Liu        | Sanofi, Paris, France                                                                                                                |
| Katherine Call    | Sanofi, Paris, France                                                                                                                |
| Tai-He Xia        | Sanofi, Paris, France                                                                                                                |
| Beryl Cummings    | Maze Therapeutics, San Francisco, CA, United States                                                                                  |
| Matt Brauer       | Maze Therapeutics, San Francisco, CA, United States                                                                                  |
| Huilei Xu         | Novartis, Basel, Switzerland                                                                                                         |
| Amy Cole          | Novartis, Basel, Switzerland                                                                                                         |
| Jonathan Chung    | Novartis, Basel, Switzerland                                                                                                         |
| Jaison Jacob      | Novartis, Basel, Switzerland                                                                                                         |
| Katrina de Lange  | Novartis, Basel, Switzerland                                                                                                         |
| Jonas Zierer      | Novartis, Basel, Switzerland                                                                                                         |
| Mitja Kurki       | Institute for Molecular Medicine Finland, HiLIFE, University of Helsinki, Finland / Broad<br>Institute, Cambridge, MA, United States |
| Samuli Ripatti    | Institute for Molecular Medicine Finland, HiLIFE, University of Helsinki, Finland                                                    |
| Mark Daly         | Institute for Molecular Medicine Finland, HiLIFE, University of Helsinki, Finland                                                    |

Juha Karjalainen Institute for Molecular Medicine Finland, HiLIFE, University of Helsinki, Finland / Broad Institute, Cambridge, MA, United States

Aki Havulinna Institute for Molecular Medicine Finland, HiLIFE, University of Helsinki, Finland

Juha Mehtonen Institute for Molecular Medicine Finland, HiLIFE, University of Helsinki, Finland

Priit Palta Institute for Molecular Medicine Finland, HiLIFE, University of Helsinki, Finland

Shabbeer Hassan Institute for Molecular Medicine Finland, HiLIFE, University of Helsinki, Finland

Pietro Della Briotta Parolo Institute for Molecular Medicine Finland, HiLIFE, University of Helsinki, Finland

Wei Zhou Broad Institute, Cambridge, MA, United States

Mutaamba Maasha Broad Institute, Cambridge, MA, United States

Shabbeer Hassan Institute for Molecular Medicine Finland, HiLIFE, University of Helsinki, Finland

Susanna Lemmelä Institute for Molecular Medicine Finland, HiLIFE, University of Helsinki, Finland

Manuel Rivas University of Stanford, Stanford, CA, United States

Aarno Palotie Institute for Molecular Medicine Finland, HiLIFE, University of Helsinki, Finland

Arto Lehisto Institute for Molecular Medicine Finland, HiLIFE, University of Helsinki, Finland

Andrea Ganna Institute for Molecular Medicine Finland, HiLIFE, University of Helsinki, Finland

Vincent Llorens Institute for Molecular Medicine Finland, HiLIFE, University of Helsinki, Finland

Hannele Laivuori Institute for Molecular Medicine Finland, HiLIFE, University of Helsinki, Finland

Mari E Niemi Institute for Molecular Medicine Finland, HiLIFE, University of Helsinki, Finland

Taru Tukiainen Institute for Molecular Medicine Finland, HiLIFE, University of Helsinki, Finland

Mary Pat Reeve Institute for Molecular Medicine Finland, HiLIFE, University of Helsinki, Finland

Henrike Heyne Institute for Molecular Medicine Finland, HiLIFE, University of Helsinki, Finland

Nina Mars Institute for Molecular Medicine Finland, HiLIFE, University of Helsinki, Finland

Kimmo Palin University of Helsinki, Helsinki, Finland

Javier Garcia-Tabuenca University of Tampere, Tampere, Finland

Harri Siirtola University of Tampere, Tampere, Finland

Tuomo Kiiskinen Institute for Molecular Medicine Finland, HiLIFE, University of Helsinki, Finland

Jiwoo Lee Institute for Molecular Medicine Finland, HiLIFE, University of Helsinki, Finland / Broad Institute, Cambridge, MA, United States

Kristin Tsuo Institute for Molecular Medicine Finland, HiLIFE, University of Helsinki, Finland / Broad Institute, Cambridge, MA, United States





## Biobank directors

|                  |                                                                                                                 |
|------------------|-----------------------------------------------------------------------------------------------------------------|
| Lila Kallio      | Auria Biobank / University of Turku / Hospital District of Southwest Finland, Turku, Finland                    |
| Sirpa Soini      | THL Biobank / The National Institute of Health and Welfare Helsinki, Finland                                    |
| Jukka Partanen   | Finnish Red Cross Blood Service / Finnish Hematology Registry and Clinical Biobank, Helsinki, Finland           |
| Eero Punkka      | Helsinki Biobank / Helsinki University and Hospital District of Helsinki and Uusimaa, Helsinki                  |
| Raisa Serpi      | Northern Finland Biobank Borealis / University of Oulu / Northern Ostrobothnia Hospital District, Oulu, Finland |
| Johanna Mäkelä   | Finnish Clinical Biobank Tampere / University of Tampere / Pirkanmaa Hospital District, Tampere, Finland        |
| Veli-Matti Kosma | Biobank of Eastern Finland / University of Eastern Finland / Northern Savo Hospital District, Kuopio, Finland   |
| Teijo Kuopio     | Central Finland Biobank / University of Jyväskylä / Central Finland Health Care District, Jyväskylä, Finland    |

## FinnGen Teams

### Administration

|               |                                                                                   |
|---------------|-----------------------------------------------------------------------------------|
| Anu Jalanko   | Institute for Molecular Medicine Finland, HiLIFE, University of Helsinki, Finland |
| Huei-Yi Shen  | Institute for Molecular Medicine Finland, HiLIFE, University of Helsinki, Finland |
| Risto Kajanne | Institute for Molecular Medicine Finland, HiLIFE, University of Helsinki, Finland |
| Mervi Aavikko | Institute for Molecular Medicine Finland, HiLIFE, University of Helsinki, Finland |

### Analysis

|                  |                                                                                                                                   |
|------------------|-----------------------------------------------------------------------------------------------------------------------------------|
| Mitja Kurki      | Institute for Molecular Medicine Finland, HiLIFE, University of Helsinki, Finland / Broad Institute, Cambridge, MA, United States |
| Juha Karjalainen | Institute for Molecular Medicine Finland, HiLIFE, University of Helsinki, Finland / Broad Institute, Cambridge, MA, United States |

Pietro Della Briotta Parolo Institute for Molecular Medicine Finland, HiLIFE, University of Helsinki, Finland  
Arto Lehisto Institute for Molecular Medicine Finland, HiLIFE, University of Helsinki, Finland  
Juha Mehtonen Institute for Molecular Medicine Finland, HiLIFE, University of Helsinki, Finland  
Wei Zhou Broad Institute, Cambridge, MA, United States  
Masahiro Kanai Broad Institute, Cambridge, MA, United States  
Mutaamba Maasha Broad Institute, Cambridge, MA, United States

### **Clinical Endpoint Development**

Hannele Laivuori Institute for Molecular Medicine Finland, HiLIFE, University of Helsinki, Finland  
Aki Havulinna Institute for Molecular Medicine Finland, HiLIFE, University of Helsinki, Finland  
Susanna Lemmelä Institute for Molecular Medicine Finland, HiLIFE, University of Helsinki, Finland  
Tuomo Kiiskinen Institute for Molecular Medicine Finland, HiLIFE, University of Helsinki, Finland  
L. Elisa Lahtela Institute for Molecular Medicine Finland, HiLIFE, University of Helsinki, Finland  
Matti Peura Institute for Molecular Medicine Finland, HiLIFE, University of Helsinki, Finland

### **Communication**

Mari Kaunisto Institute for Molecular Medicine Finland, HiLIFE, University of Helsinki, Finland

### **Data Management and IT Infrastructure**

Elina Kilpeläinen Institute for Molecular Medicine Finland, HiLIFE, University of Helsinki, Finland  
Timo P. Sipilä Institute for Molecular Medicine Finland, HiLIFE, University of Helsinki, Finland  
Georg Brein Institute for Molecular Medicine Finland, HiLIFE, University of Helsinki, Finland  
Oluwaseun A. Dada Institute for Molecular Medicine Finland, HiLIFE, University of Helsinki, Finland  
Awaisa Ghazal Institute for Molecular Medicine Finland, HiLIFE, University of Helsinki, Finland  
Anastasia Shcherban Institute for Molecular Medicine Finland, HiLIFE, University of Helsinki, Finland

### **Genotyping**

Kati Donner Institute for Molecular Medicine Finland, HiLIFE, University of Helsinki, Finland  
Timo P. Sipilä Institute for Molecular Medicine Finland, HiLIFE, University of Helsinki, Finland

### **Sample Collection Coordination**

Anu Loukola Helsinki Biobank / Helsinki University and Hospital District of Helsinki and Uusimaa,  
Helsinki

### **Sample Logistics**

Päivi Laiho THL Biobank / The National Institute of Health and Welfare Helsinki, Finland

Tuuli Sistonen THL Biobank / The National Institute of Health and Welfare Helsinki, Finland

Essi Kaiharju THL Biobank / The National Institute of Health and Welfare Helsinki, Finland

Markku Laukkanen THL Biobank / The National Institute of Health and Welfare Helsinki, Finland

Elina Järvensivu THL Biobank / The National Institute of Health and Welfare Helsinki, Finland

Sini Lähteenmäki THL Biobank / The National Institute of Health and Welfare Helsinki, Finland

Lotta Männikkö THL Biobank / The National Institute of Health and Welfare Helsinki, Finland

Regis Wong THL Biobank / The National Institute of Health and Welfare Helsinki, Finland

### **Registry Data Operations**

Hannele Mattsson THL Biobank / The National Institute of Health and Welfare Helsinki, Finland

Kati Kristiansson THL Biobank / The National Institute of Health and Welfare Helsinki, Finland

Susanna Lemmelä Institute for Molecular Medicine Finland, HiLIFE, University of Helsinki, Finland

Sami Koskelainen THL Biobank / The National Institute of Health and Welfare Helsinki, Finland

Tero Hiekkalinna THL Biobank / The National Institute of Health and Welfare Helsinki, Finland

Teemu Paajanen THL Biobank / The National Institute of Health and Welfare Helsinki, Finland

### **Sequencing Informatics**

Priit Palta Institute for Molecular Medicine Finland, HiLIFE, University of Helsinki, Finland

Kalle Pärn Institute for Molecular Medicine Finland, HiLIFE, University of Helsinki, Finland

Shuang Luo Institute for Molecular Medicine Finland, HiLIFE, University of Helsinki, Finland

Vishal Sinha Institute for Molecular Medicine Finland, HiLIFE, University of Helsinki, Finland

**Trajectory Team**

Tarja Laitinen Pirkanmaa Hospital District, Tampere, Finland

Harri Siirtola University of Tampere, Tampere, Finland

Javier Gracia-Tabuena University of Tampere, Tampere, Finland

**Data protection officer**

Tero Jyrhämä Institute for Molecular Medicine Finland, HiLIFE, University of Helsinki, Finland

**FinBB - Finnish biobank cooperative**

Marco Hautalahti

Laura Mustaniemi

Mirkka Koivusalo

Sarah Smith

Tom Southerington
