# Supplementary material for: Leveraging Northern European population history; novel low frequency variants for polycystic ovary syndrome
Source: bioRxiv or medRxiv preprint supplement (doi:10.1101/2021.05.20.21257510), 2021-05-23
Supplement: Supplementary file [file media-5.pdf]

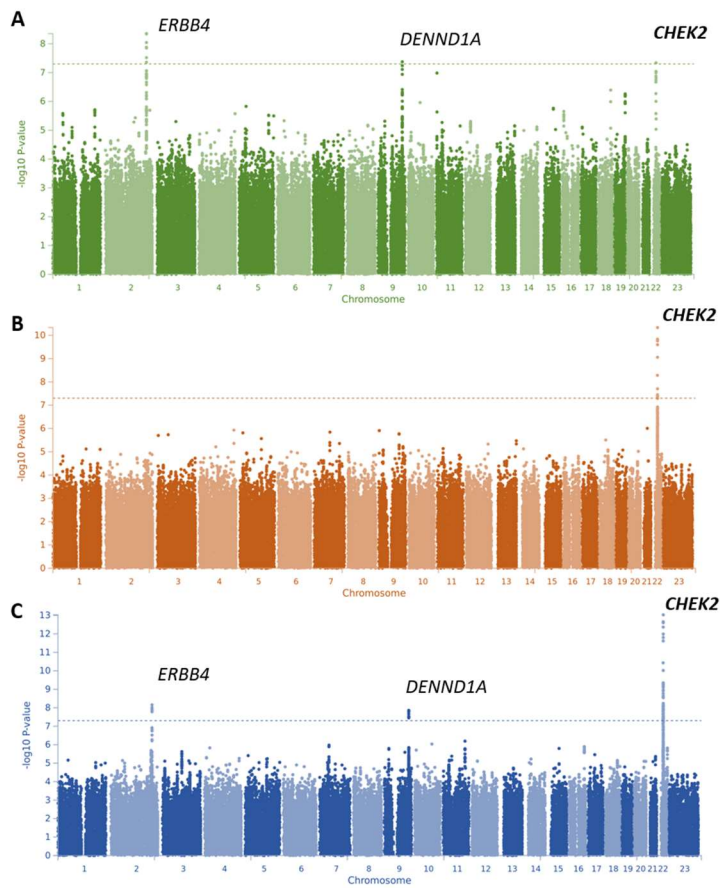

**Supplementary Fig 2. Manhattan plot for age- and BMI-adjusted GWAS in the Finnish dataset (A) the Estonian dataset (B) and the joint GWAS meta-analysis of PCOS (C).** The novel candidates are highlighted in bold. The y axis represents  $-\log(\text{two-sided } P \text{ values})$  for association between variants and PCOS from meta-analysis using an inverse-variance weighted fixed effects model. The horizontal dashed line represents the threshold for genome-wide significance.
